# Supplementary material
Source: Springer Nature journal article supplement (https://www.springermedizin.de/resource/supplementary/12936_2013_3070_MOESM8_ESM.pdf/9546282)
Supplement: MOESM8 [file 9546282]

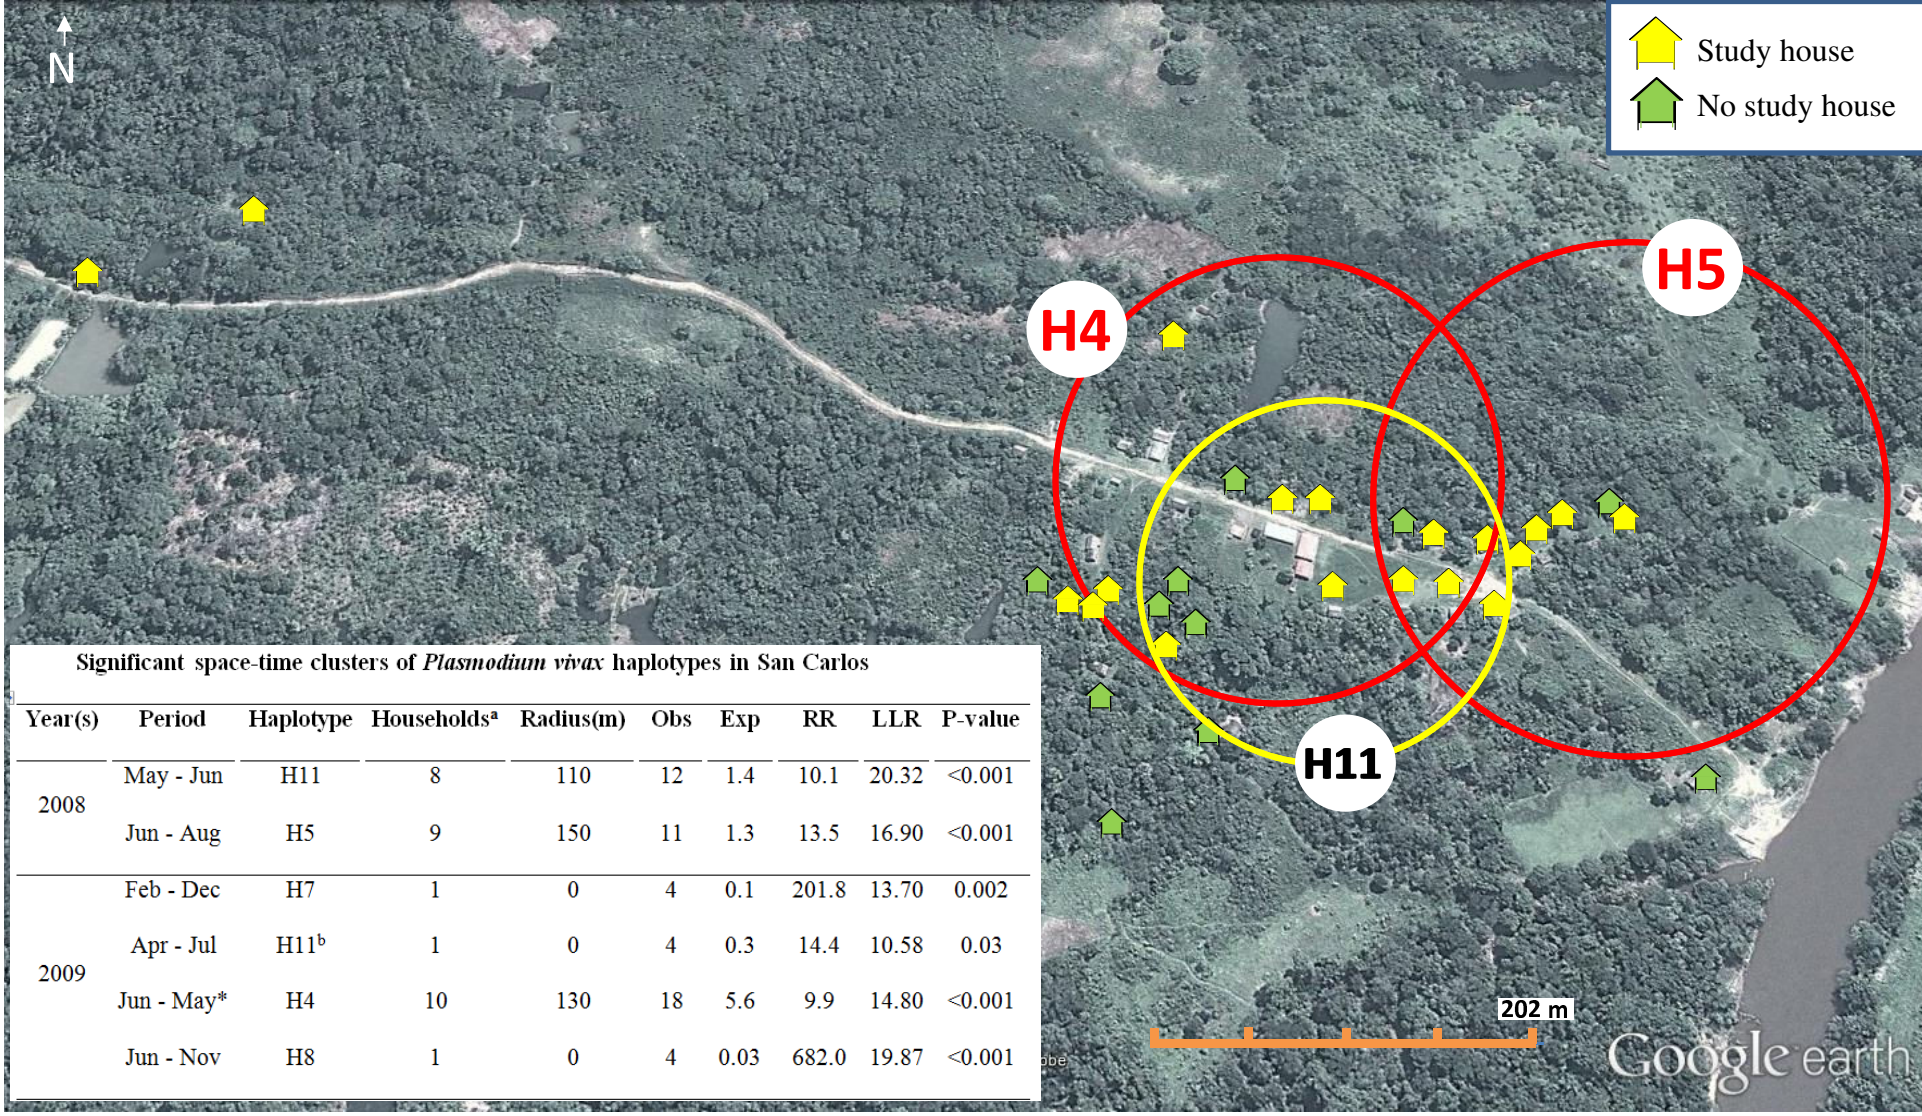

 Study house  
 No study house

Significant space-time clusters of *Plasmodium vivax* haplotypes in San Carlos

| Year(s) | Period     | Haplotype        | Households <sup>a</sup> | Radius(m) | Obs | Exp  | RR    | LLR   | P-value |
|---------|------------|------------------|-------------------------|-----------|-----|------|-------|-------|---------|
| 2008    | May - Jun  | H11              | 8                       | 110       | 12  | 1.4  | 10.1  | 20.32 | <0.001  |
|         | Jun - Aug  | H5               | 9                       | 150       | 11  | 1.3  | 13.5  | 16.90 | <0.001  |
| 2009    | Feb - Dec  | H7               | 1                       | 0         | 4   | 0.1  | 201.8 | 13.70 | 0.002   |
|         | Apr - Jul  | H11 <sup>b</sup> | 1                       | 0         | 4   | 0.3  | 14.4  | 10.58 | 0.03    |
|         | Jun - May* | H4               | 10                      | 130       | 18  | 5.6  | 9.9   | 14.80 | <0.001  |
|         | Jun - Nov  | H8               | 1                       | 0         | 4   | 0.03 | 682.0 | 19.87 | <0.001  |

202 m

Google earth
